# Supplementary material for: Genomic Surveillance of Recent Dengue Outbreaks in Colombo, Sri Lanka
Source: MDPI journal article supplement (doi:10.3390/v15071408), 2023-06-21

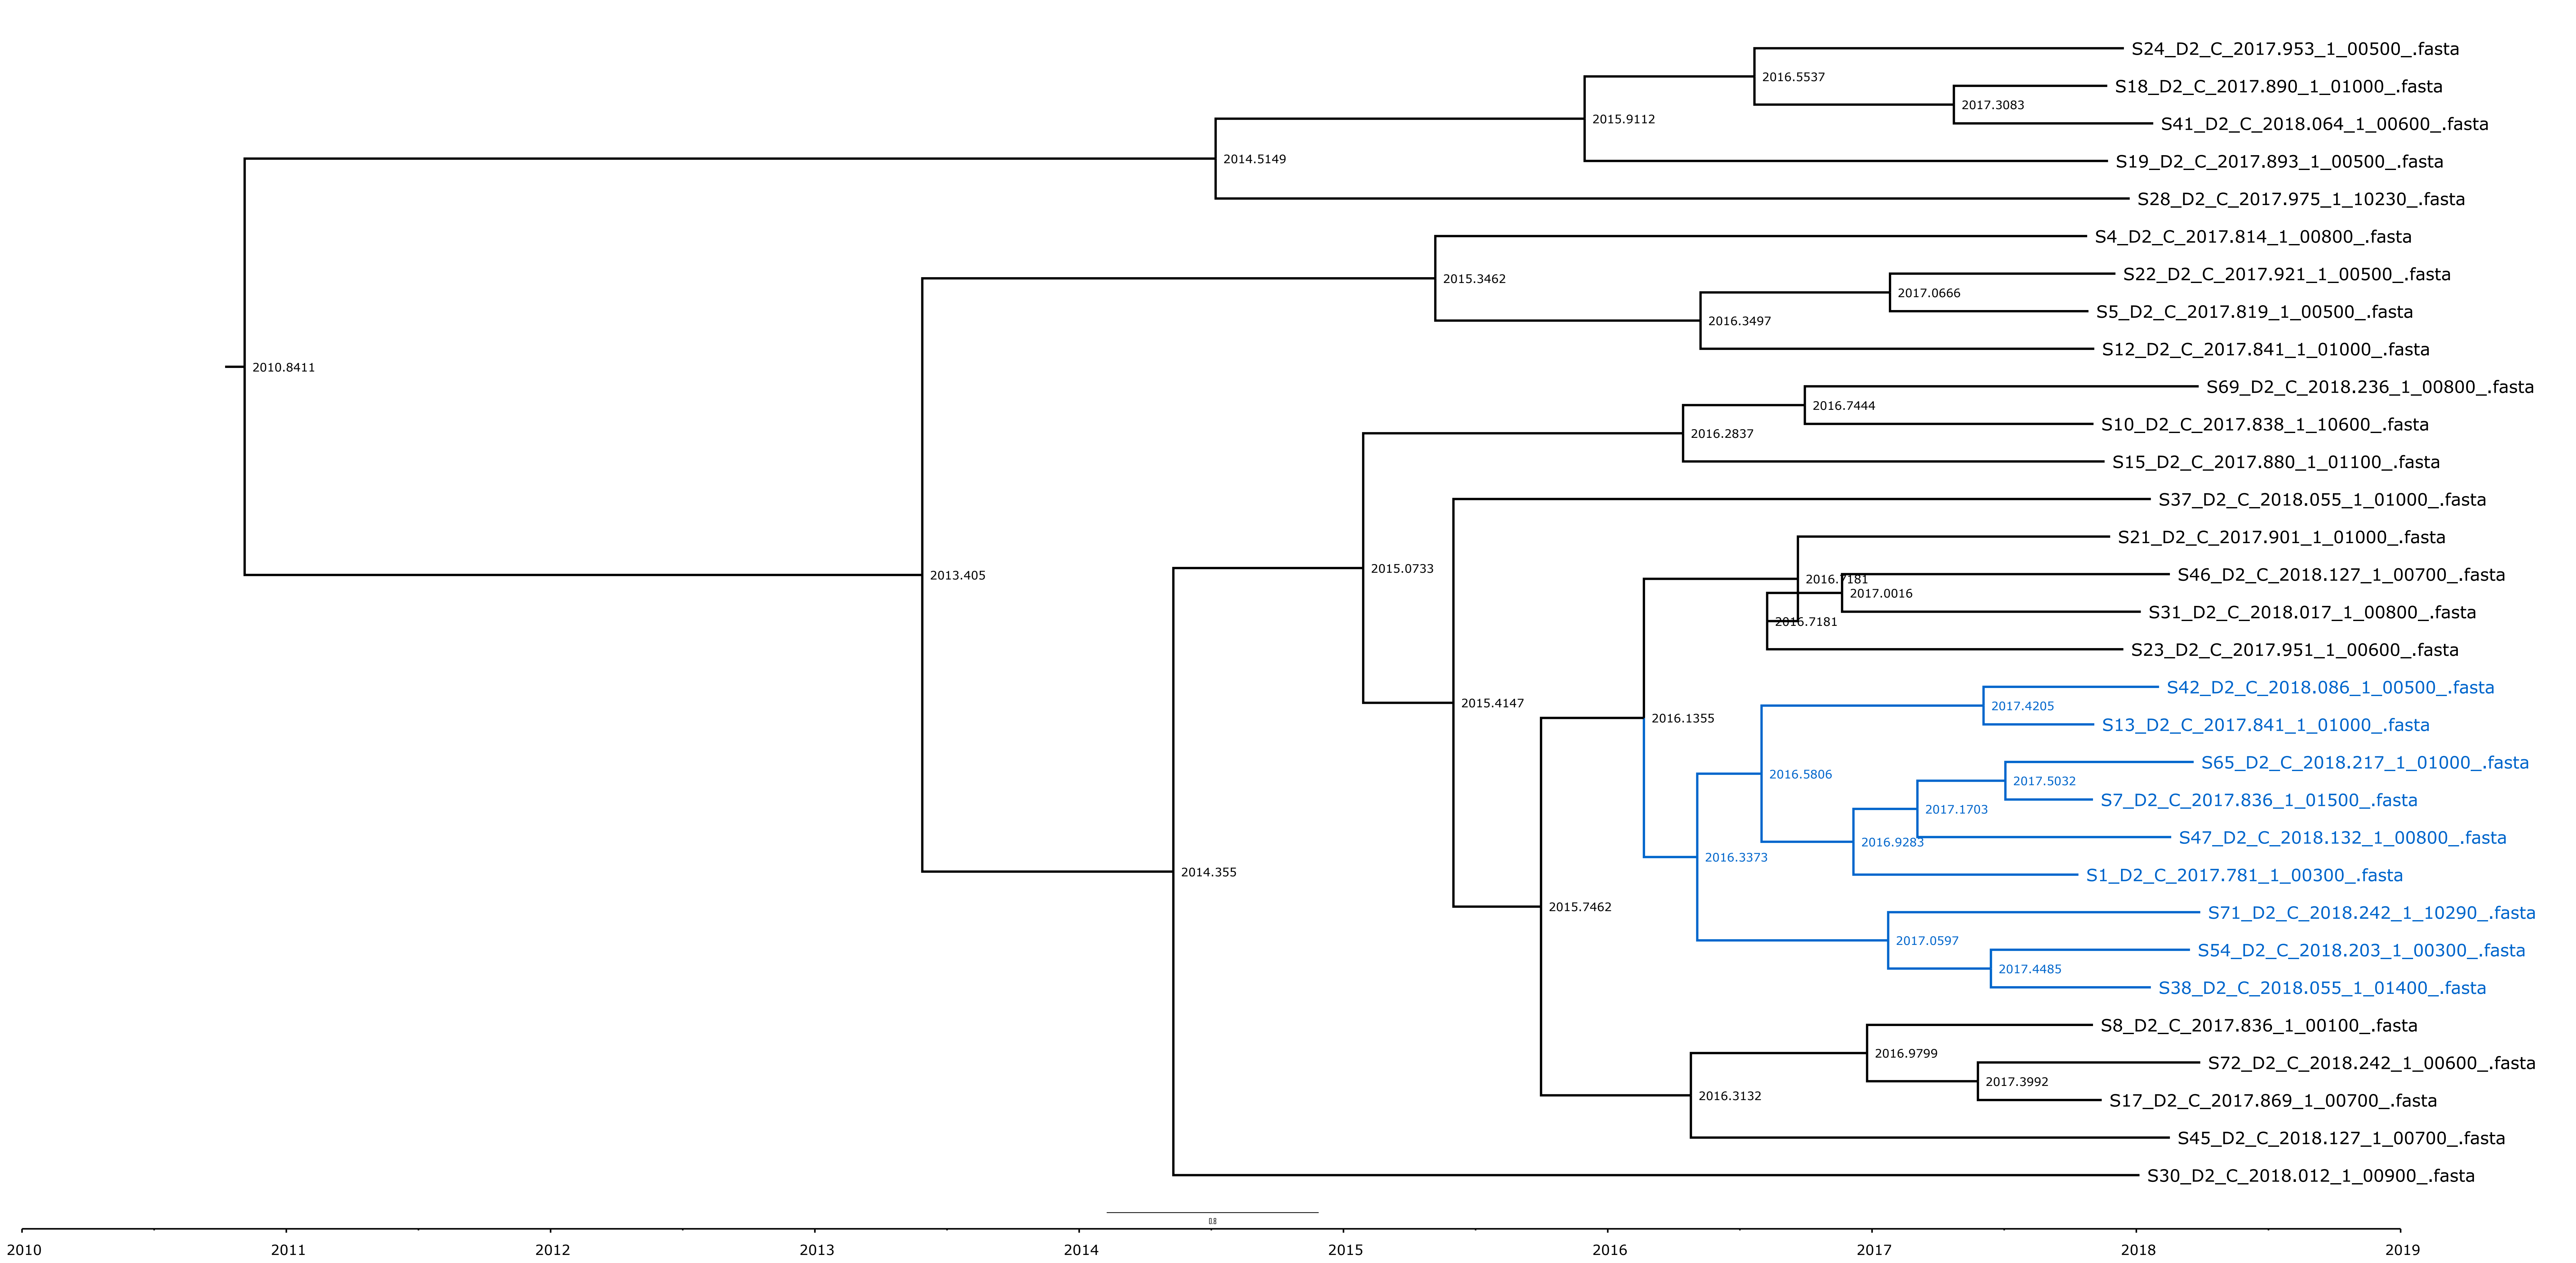

Supplement: s1 [file s1]
