# Supplementary material for: Genomic Surveillance of Recent Dengue Outbreaks in Colombo, Sri Lanka
Source: MDPI journal article supplement (doi:10.3390/v15071408), 2023-06-21
Supplement: s1 [file s1]

---

## Supplementary Table 1

### Summary of illness severity statistics of each of the sequence clusters used in phylogeography analysis.

A symptom score was calculated each day of hospitalization and the maximum value was selected for analysis.  $P > 0.05$  for all comparisons when adjusted for previous dengue infections.

| Cluster | Cases | Maximum symptom score (Mean/SD) | Duration of hospitalization (Mean/SD) | Severe dengue (valid percent) | Plasma leakage (valid percent) |
|---------|-------|---------------------------------|---------------------------------------|-------------------------------|--------------------------------|
| Q       | 45    | 4.36 /1.464                     | 6.284 /1.8097                         | 4.4                           | 55.6                           |
| R       | 17    | 4.58 /2.021                     | 5.8 /1.5586                           | 0                             | 75                             |
| S       | 16    | 4.23 /1.6141                    | 5.668 /1.7523                         | 7.7                           | 69.2                           |
| T       | 37    | 4.68 /1.62                      | 6.756 /1.2869                         | 3.2                           | 64.5                           |
